# Supplementary material for: Ultrafast fluorescence depolarisation in green fluorescence protein tandem dimers as hydrophobic environment sensitive probes
Source: Royal Society of Chemistry journal article supplement (doi:10.1039/d3cp01765f), 2023-01-01
Supplement: d3cp01765f1.pdf [file d3cp01765f1.pdf]

## Supplementary Information for

### Ultrafast Fluorescence Depolarisation in Green Fluorescence Protein Tandem Dimers as Hydrophobic Environment Sensitive Probes

Alejandro Sanchez-Pedreno Jimenez<sup>1,2,4</sup>, Henry L. Puhl III<sup>3</sup>, Steven S. Vogel<sup>3\*</sup>, and Youngchan Kim<sup>1,2,4\*</sup>

<sup>1</sup>Leverhulme Quantum Biology Doctoral Training Centre, University of Surrey, Guildford GU2 7XH, UK.

<sup>2</sup>Department of Microbial Sciences, School of Biosciences, University of Surrey, Guildford GU2 7XH, UK.

<sup>3</sup>Laboratory of Biophotonics and Quantum Biology, NIAAA, NIH, Bethesda, USA.

<sup>4</sup>Advanced Technology Institute, University of Surrey, Guildford GU2 7XH, UK.

\*Corresponding authors. Emails: [stevevog@mail.nih.gov](mailto:stevevog@mail.nih.gov); [youngchan.kim@surrey.ac.uk](mailto:youngchan.kim@surrey.ac.uk)

#### **This file includes:**

Figures S1-5

Equation S1

Table S1

## Instrument response function

To measure the instrument response function we used Ludox as a scattering sample at the same wavelength of excitation Figure S1. Each curve was fit to a Gaussian function to parametrise the instrument response function (IRF) of the TCSPC system. The full width half maximum (FWHM) of the IRF lies in the range  $\text{FWHM} = 83.62 \pm 1.14$  ps.

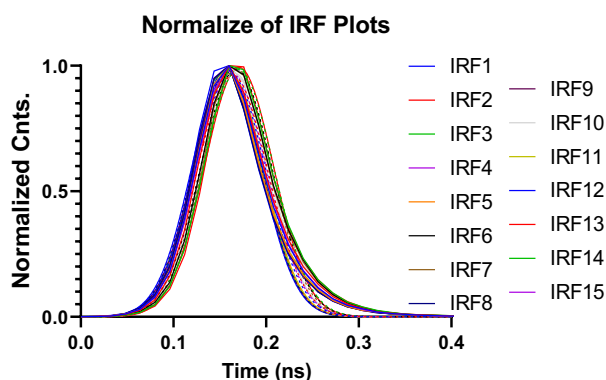

**Figure S1.** Instrument response function. Ludox was used as a scattering sample. The curves represent individual measurements.

## Fluorescein tail fitting for G-Factor calibration

G-Factor was calculated by tail fitting of fluorescein decay curves using equation S1.

$$G = \frac{\int VV(t)dt}{\int VH(t)dt} \quad [\text{Equation S1}]$$

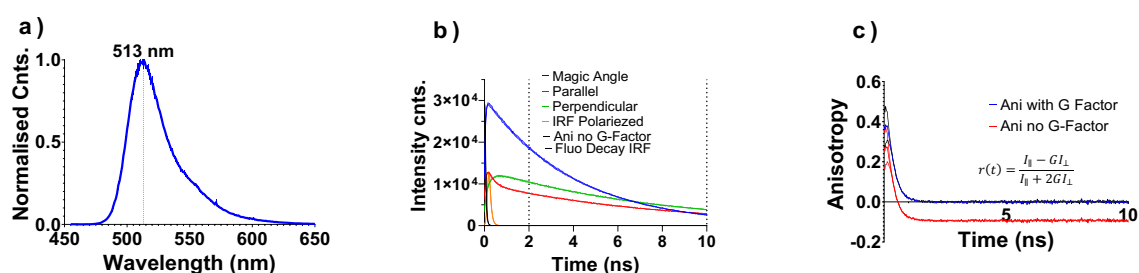

**Figure S2.** Instrument calibration using Fluorescein 0.5  $\mu\text{M}$ . a) Steady state fluorescence spectra. b) TCSPC Blue is magic angle red is parallel green is perpendicular (IRF in orange), c) Anisotropy of fluorescein with (blue) and without (red) G-Factor correction.

## Individual decay curves

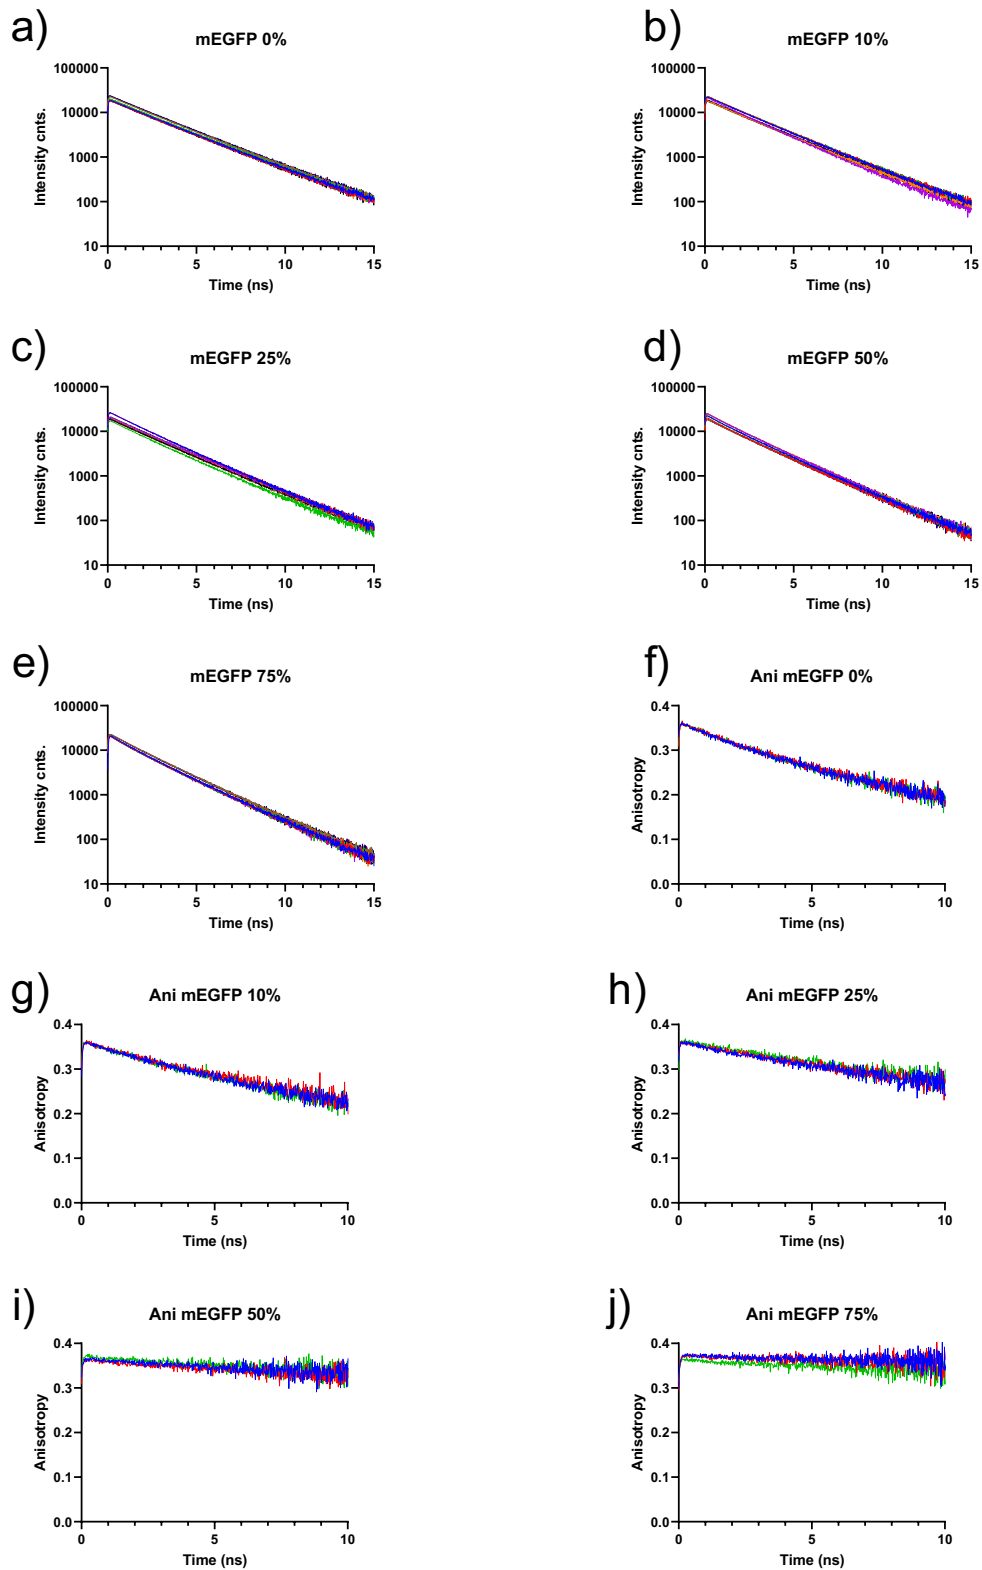

**Figure S3.** Time resolved fluorescence decay curves of 1  $\mu\text{M}$  mEGFP in PBS in a range of glycerol concentrations. TCSPC decay curves (a-e). Anisotropy curves (f-j). Each decay curve represents the average of 3 technical replicates.

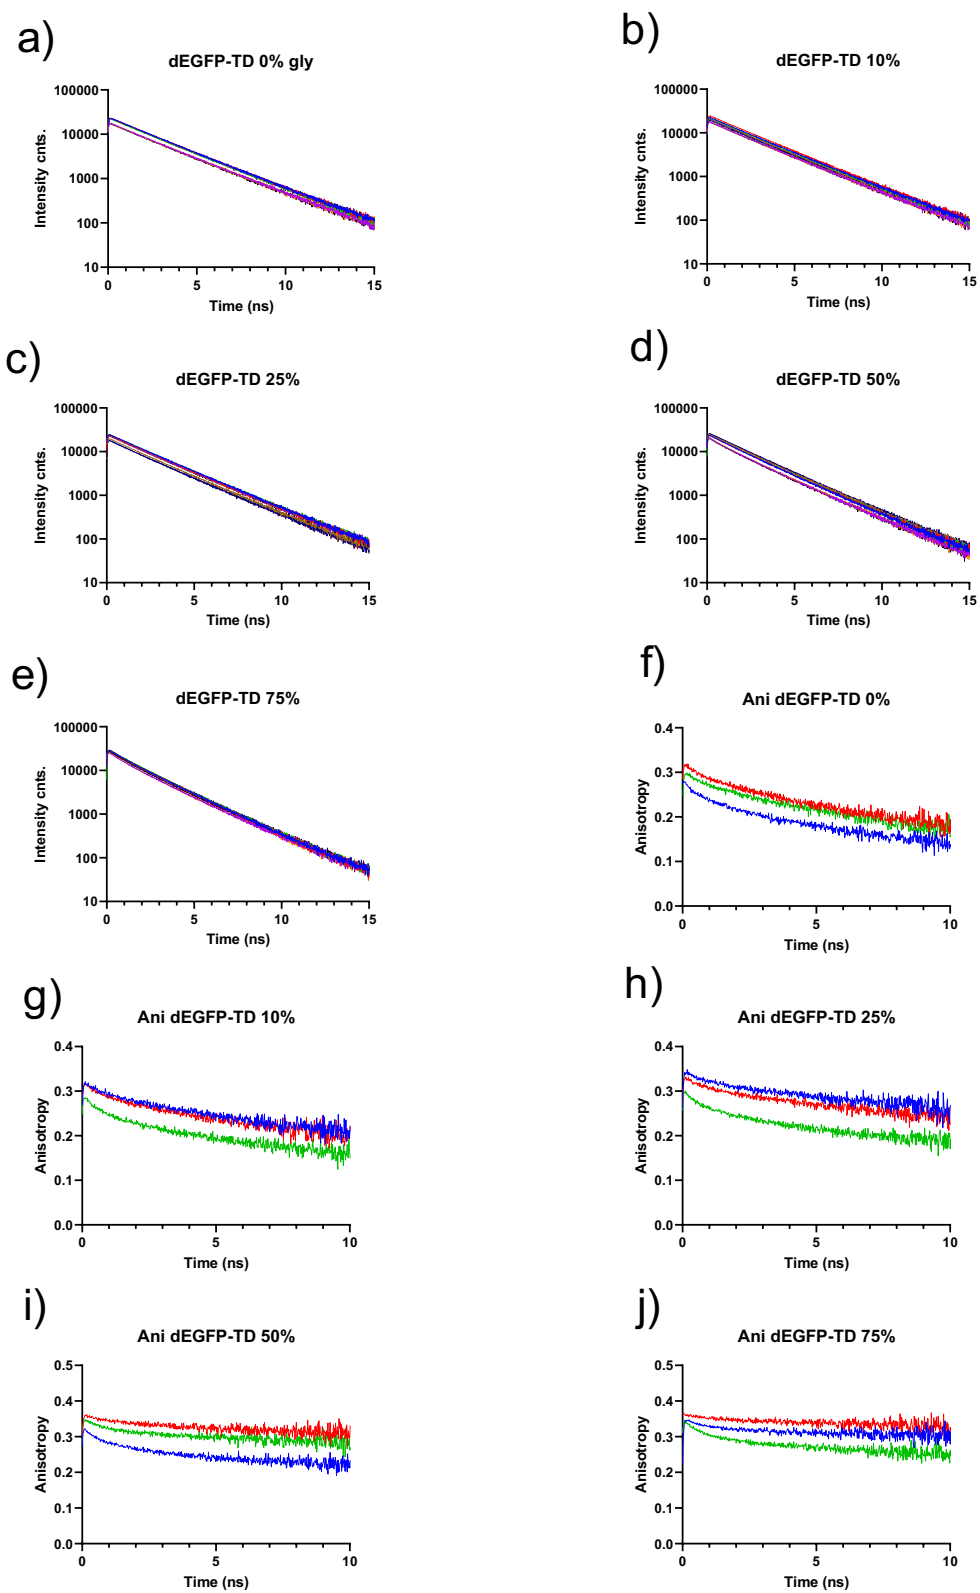

**Figure S4.** Time-resolved fluorescence decay curves of 1  $\mu\text{M}$  dEGFP-TD in PBS in a range of glycerol concentrations. TCSPC decay curves (a-e). Anisotropy curves (f-j). Each decay curve represents the average of 3 technical replicates.

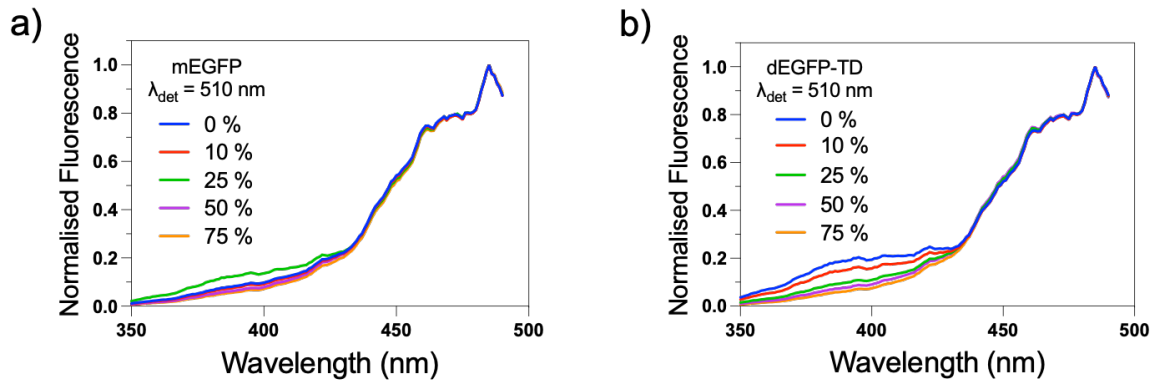

**Figure S5.** The normalised excitation spectra of a) mEGFP and b) dEGFP-TD at a range of glycerol/PBS mixtures. The fluorescence intensity was measured at 510 nm.

**Table S1** The initial anisotropy of mEGFP and dEGFP-TD, which is the value of the anisotropy at  $t=0$  after short pulse excitation. The glycerol percentages are given by volume.

| % Glycerol in PBS | Limiting anisotropy ( $r$ ) $\pm$ SD |                 |
|-------------------|--------------------------------------|-----------------|
|                   | mEGFP                                | dEGFP-TD        |
| 0%                | 0.37 $\pm$ 0.00                      | 0.30 $\pm$ 0.02 |
| 10%               | 0.37 $\pm$ 0.00                      | 0.31 $\pm$ 0.02 |
| 25%               | 0.37 $\pm$ 0.01                      | 0.33 $\pm$ 0.02 |
| 50%               | 0.37 $\pm$ 0.01                      | 0.35 $\pm$ 0.02 |
| 75%               | 0.38 $\pm$ 0.01                      | 0.36 $\pm$ 0.01 |
